# Supplementary material for: Optimal selection of common bean genotypes under genotype × environment interaction and its environmental drivers
Source: Research Square preprint supplement (doi:10.21203/rs.3.rs-8525265/v1), 2026-01-20
Supplement: Supplementary file 1 [file 5ffa6d69fe6387f225784490.docx]

**SUPPLEMENTARY FILES**

**Table 1.** Geospatial, temporal, meteorological, and derived variables used in the study, with their classification, original name, abbreviation (≤4 characters), and brief description. The variables include air temperature components, shortwave and longwave radiation, photoperiod, air and soil moisture, wind, atmospheric water balance, and thermal indices related to plant growth, with units indicated in parentheses where applicable.

| **Class.** | **Original Variable** | **Abbrev (≤4 chars)** | **Description** |
| --- | --- | --- | --- |
| **Geospatial** | LON | LON | Longitude |
|  | LAT | LAT | Latitude |
| **Temporal** | DOY | DOY | Day of Year |
|  | daysFromStart | DFS | Days from start |
| **Temperature** | T2M | T2M | Temperature at 2 m (°C) |
|  | T2M_MAX | T2MX | Max Temp at 2 m (°C) |
|  | T2M_MIN | T2MN | Min Temp at 2 m (°C) |
|  | T2MDEW | DEW | Dew/Frost Point at 2 m (°C) |
| **Radiation / Solar** | ALLSKY_SFC_LW_DWN | LWdn | All-sky surface longwave downward irradiance |
|  | ALLSKY_SFC_SW_DWN | SWdn | All-sky surface shortwave downward irradiance |
|  | ALLSKY_SFC_SW_DNI | DNI | All-sky direct normal irradiance |
|  | ALLSKY_SFC_PAR_TOT | PAR | Total PAR at surface |
|  | ALLSKY_SFC_UVA | UVA | UV-A irradiance |
|  | ALLSKY_SFC_UVB | UVB | UV-B irradiance |
| **Water / Moisture** | PRECTOT | PREC | Precipitation (mm) |
|  | EVPTRNS | EVAP | Evapotranspiration |
|  | QV2M | QV2M | Specific humidity at 2 m |
|  | RV2M | RH2M | Relative humidity at 2 m |
|  | GWETROOT | WETR | Root-zone soil wetness |
|  | GWETTOP | WETS | Surface soil wetness |
| **Wind** | WS2M | WS2M | Wind speed at 2 m |
| **Water Balance / Atmos.** | P_ETP | P_ETP | Potential ET |
|  | VPD | VPD | Vapor pressure deficit (kPa) |
| **Photoperiod / Light** | N | PHOT | Photoperiod (h) |
|  | RTA | RTA | Top-of-atmosphere radiation |
|  | n | SUNH | Clear-sky sunny hours |
| **Thermal Indices / Growth** | TH1 | TH1 | Temp-Humidity Index (NRC 1971) |
|  | TH2 | TH2 | Temp-Humidity Index (Yousef 1985) |
|  | PAR_TEMP | PRTM | PAR ÷ Temperature |
|  | GDD | GDD | Growing degree days |
|  | FRUE | FRUE | Temp effect on RUE |
|  | T2M_RANGE | T2RG | 2 m temperature range |
|  | SPV | SPV | Saturation vapor pressure slope |
| **Water Balance Derived** | ETP | ETP | Evapotranspiration |
|  | PETP | PETP | Precipitation − evapotranspiration |
